# Supplementary material for: Evolution of Codon Usage Bias in Diatoms
Source: MDPI journal article supplement (doi:10.3390/genes10110894), 2019-11-06

MMETSP0740 *Thalassiosira minuscula* CCMP1093  
MMETSP1071 *Thalassiosira* NH16  
MMETSP0905 *Thalassiosira antarctica* CCMP982  
MMETSP1067 *Thalassiosira punctigera* Tpunct2005C2  
MMETSP0973 *Thalassiosira oceanica* CCMP1005  
MMETSP0494 *Thalassiosira gravida* Gmp14c1  
MMETSP0404 *Thalassiosira rotula* CCMP3096  
MMETSP0913 *Thalassiosira rotula* GSO102  
*Thalassiosira pseudonana* CCMP1335  
MMETSP1059 *Thalassiosira* FW  
MMETSP0881 *Thalassiosira weissflogii* CCMP1336  
MMETSP1422 *Thalassiosira weissflogii* CCMP1010

Same species (p=0.415)

Same species (p=0.583)

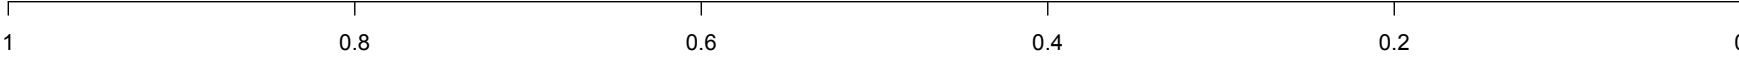

MMETSP0853 *Pseudo-nitzschia fraudulenta* WWA7  
MMETSP0142 *Pseudo-nitzschia australis* 10249-10-AB  
MMETSP1060 *Pseudo-nitzschia pungens cingulata*  
MMETSP1061 *Pseudo-nitzschia pungens pungens*  
MMETSP1423 *Pseudo-nitzschia heimii* UNC1101  
MMETSP0329 *Pseudo-nitzschia arenysensis* B593  
MMETSP0327 *Pseudo-nitzschia delicatissima* B596  
MMETSP1432 *Pseudo-nitzschia delicatissima* UNC1205

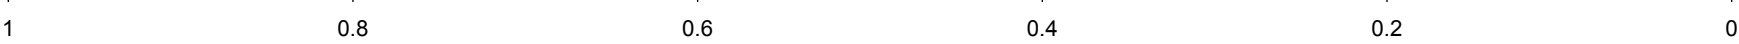

MMETSP1447 *Chaetoceros dicaeta* CCMP1751  
MMETSP0754 *Chaetoceros neogracile* CCMP1317  
MMETSP0092 *Chaetoceros affinis* CCMP159  
MMETSP1429 *Chaetoceros* UNC1202  
MMETSP1336 *Chaetoceros neogracile* RCC1993  
MMETSP0200 *Chaetoceros* GSL56  
MMETSP1435 *Chaetoceros brevis* CCMP164  
MMETSP0150 *Chaetoceros debilis* MM31A-1

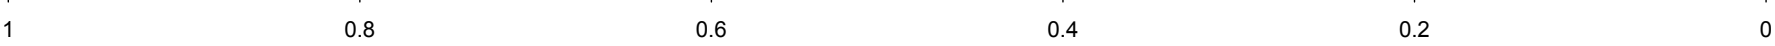

MMETSP0604 *Skeletonema menzellii* CCMP793  
MMETSP0578 *Skeletonema grethae* CCMP1804  
MMETSP0593 *Skeletonema japonicum* CCMP2506  
MMETSP1428 *Skeletonema marinoi* UNC1201  
MMETSP0563 *Skeletonema dohrnii* SkelB  
MMETSP0013 *Skeletonema costatum* RCC1716  
MMETSP0320 *Skeletonema marinoi* SM1012Den  
MMETSP0319 *Skeletonema marinoi* SM1012Hels  
MMETSP0920 *Skeletonema marinoi* skelA  
MMETSP1039 *Skeletonema marinoi* FE7  
MMETSP1040 *Skeletonema marinoi* FE60

Same species (p=0.943)

Same species (p=0.943)

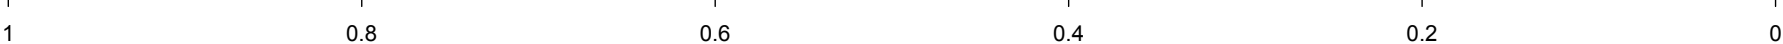

MMETSP0563 *Skeletonema dohrnii* SkelB  
MMETSP1428 *Skeletonema marinoi* UNC1201  
MMETSP0013 *Skeletonema costatum* RCC1716  
MMETSP0319 *Skeletonema marinoi* SM1012Hels  
MMETSP0920 *Skeletonema marinoi* skelA  
MMETSP0320 *Skeletonema marinoi* SM1012Den

Same species (p=0.943)

MMETSP1040 *Skeletonema marinoi* FE60  
MMETSP1039 *Skeletonema marinoi* FE7

Same species (p=0.943)

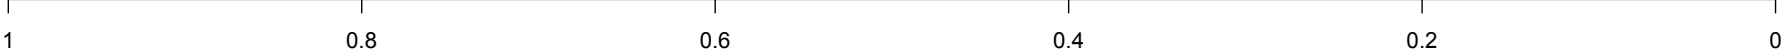

Supplement: s1 [file s1]
