# Supplementary figures and images for: Evolution of Codon Usage Bias in Diatoms
Source: MDPI journal article supplement (doi:10.3390/genes10110894), 2019-11-06

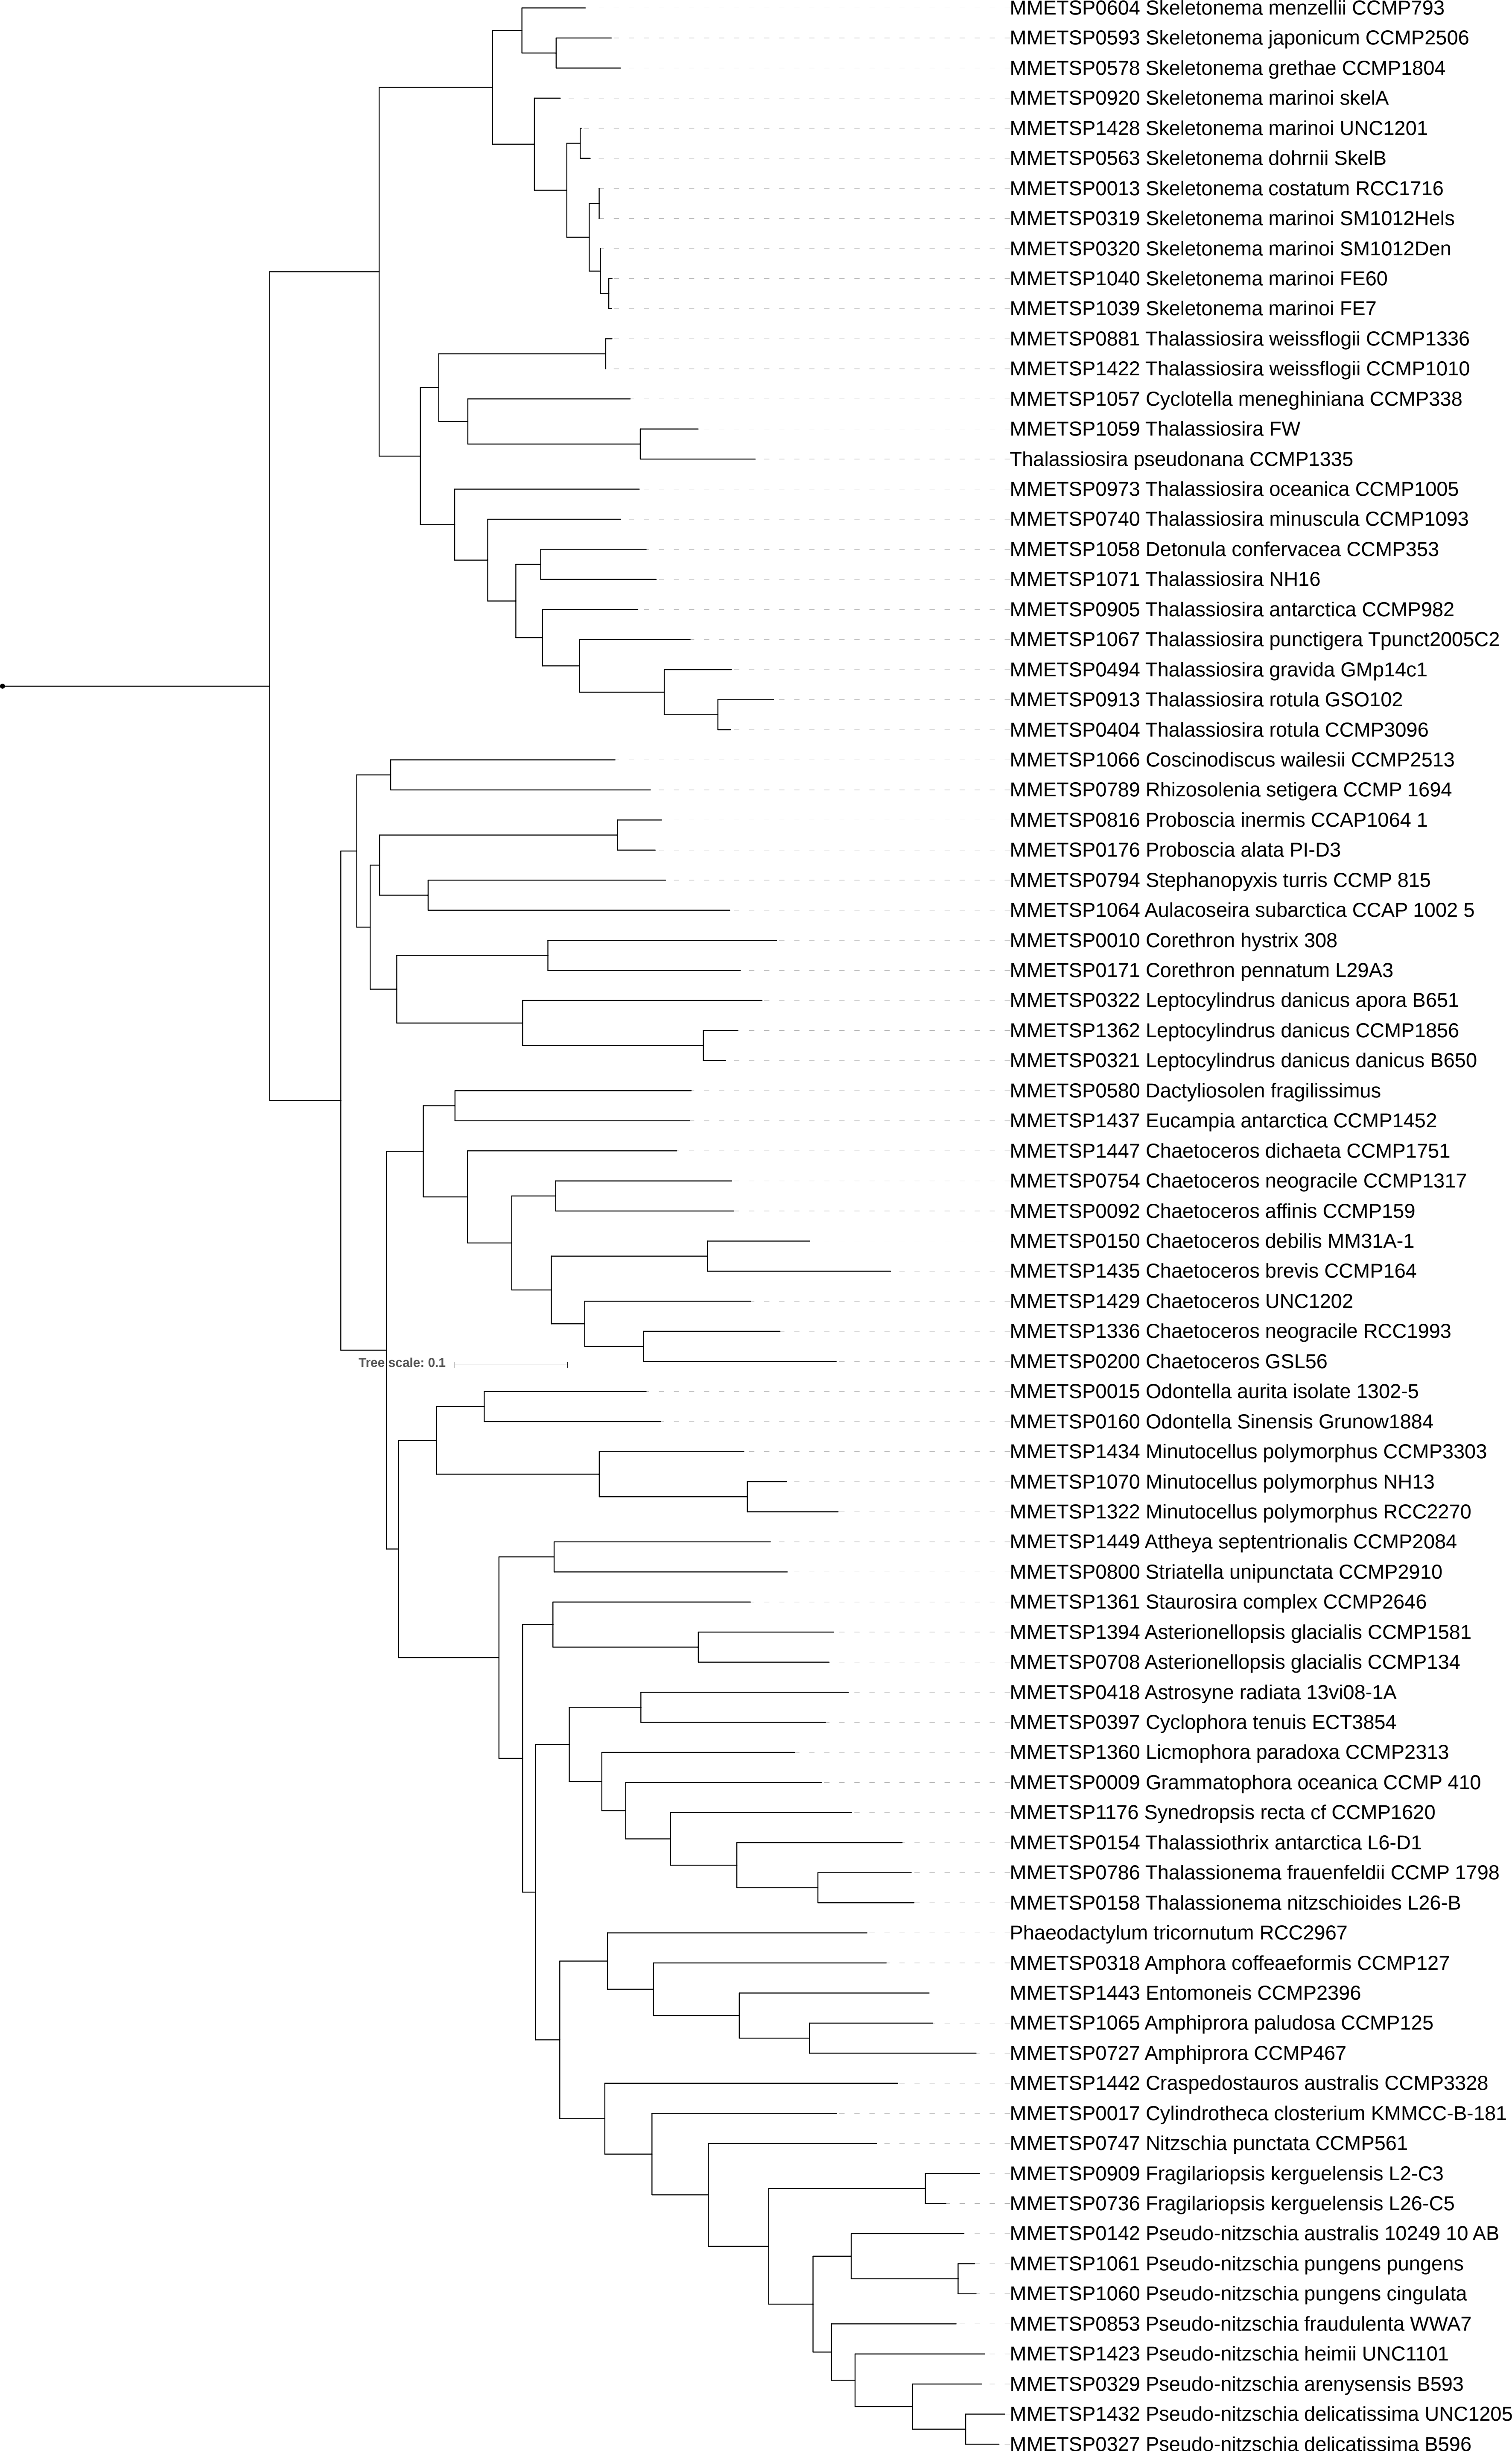

Supplement: s1 [file s1]

GC at GC3s sites

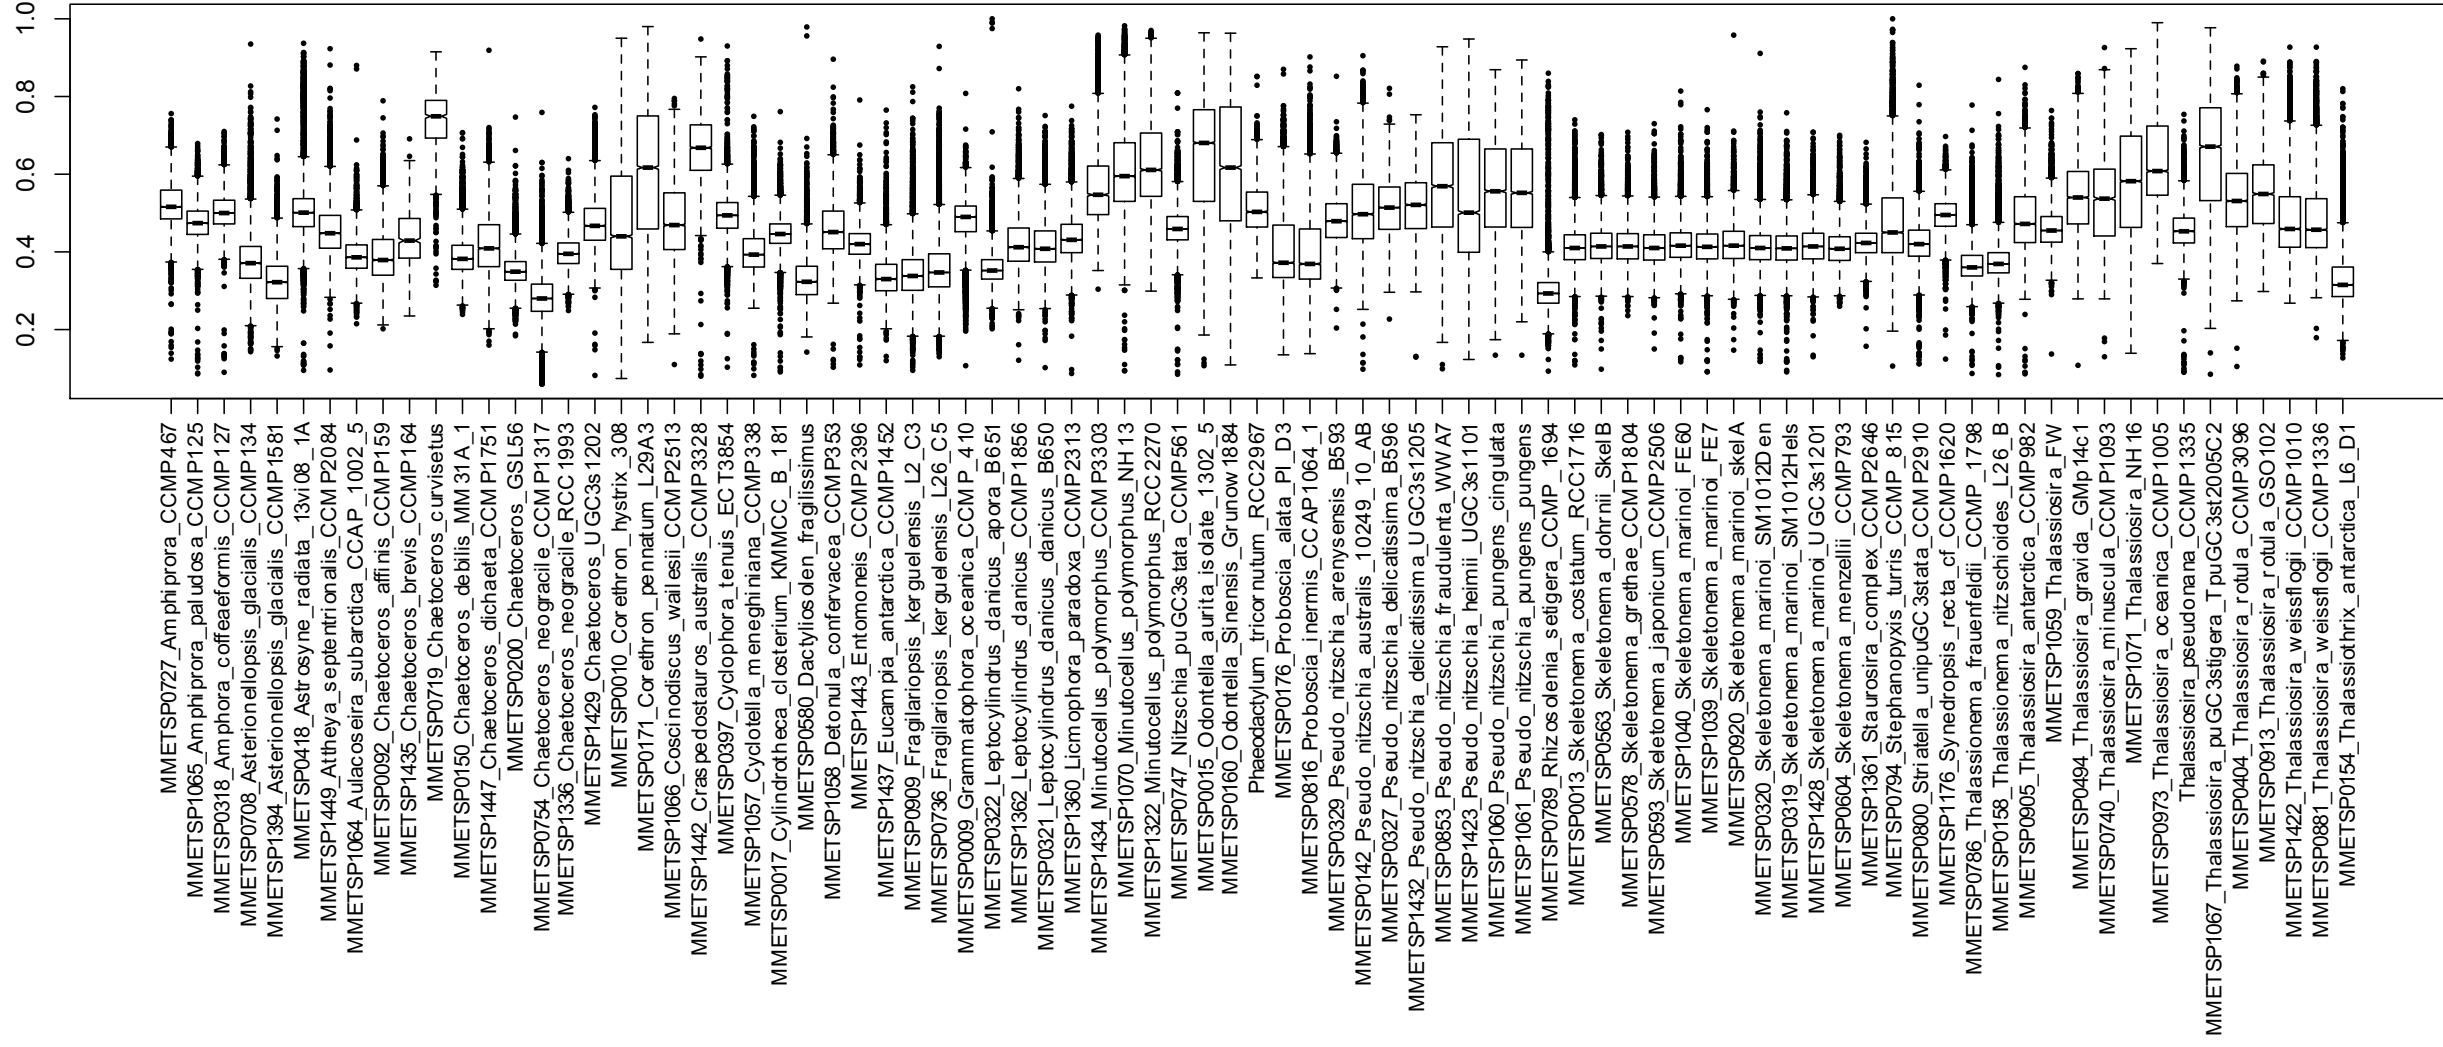

Frequency of optimal codons

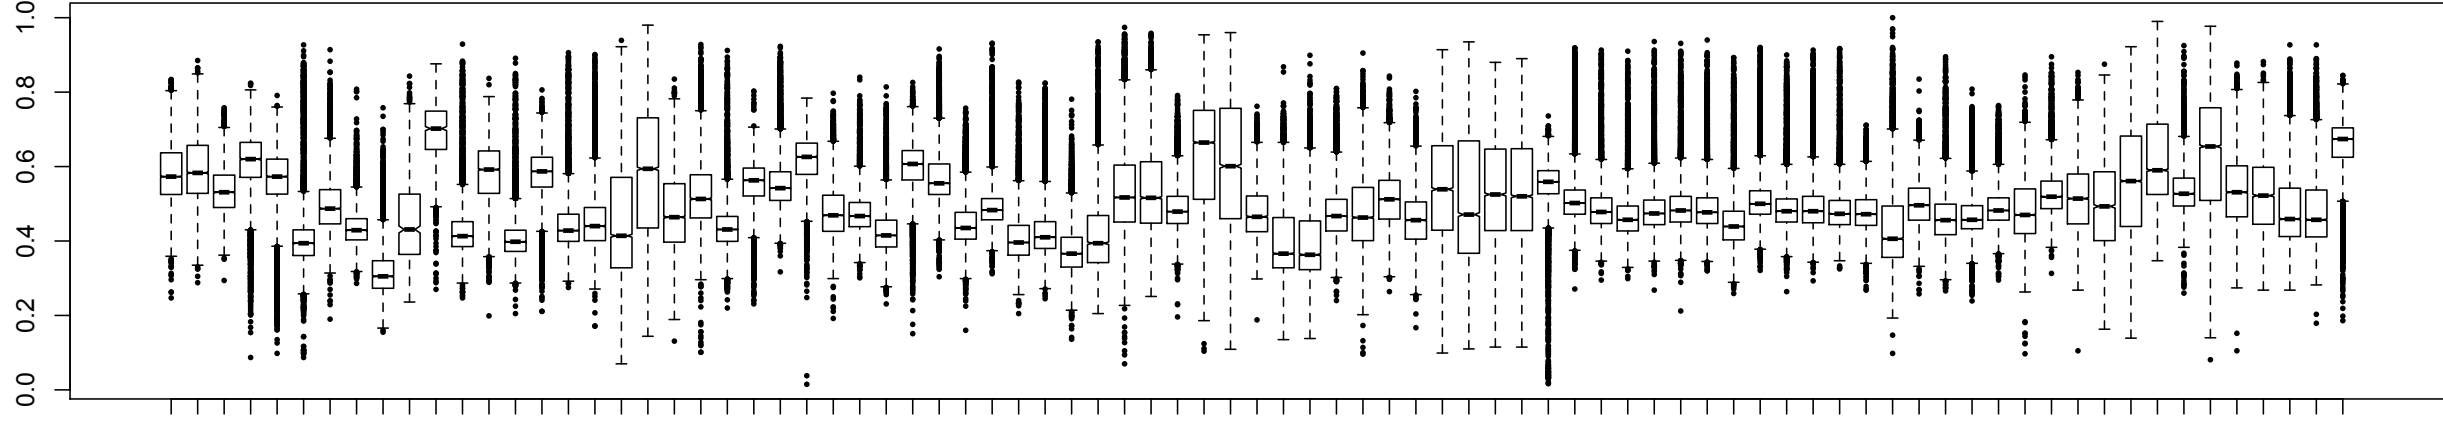

Effective number of codons

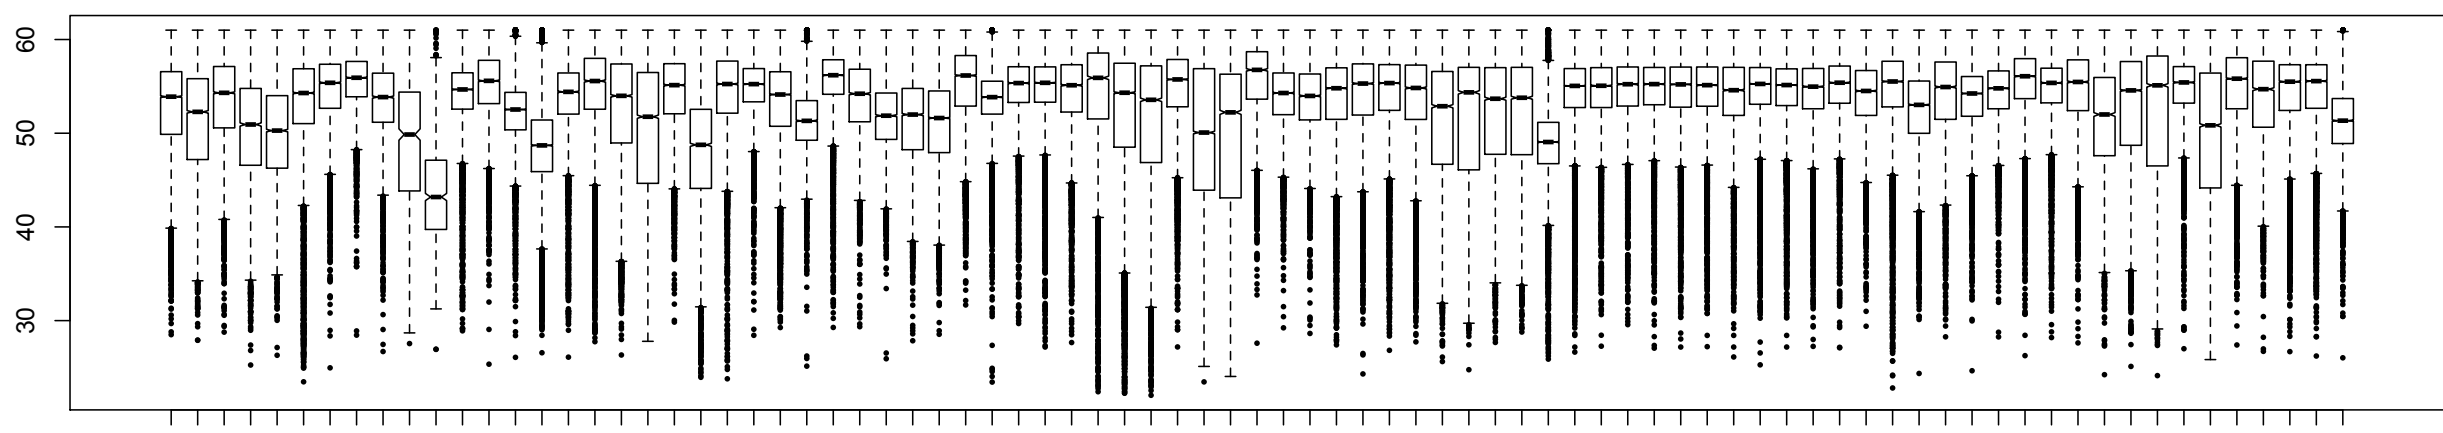

Supplement: s1 [file s1]
